# Supplementary material for: Changes in chromatin accessibility ensure robust cell cycle exit in terminally differentiated cells
Source: PLoS Biol. 2019 Sep 3;17(9):e3000378. doi: 10.1371/journal.pbio.3000378 (PMC6743789; doi:10.1371/journal.pbio.3000378)
Supplement: S5 Data — (XLSX) [file pbio.3000378.s019.xlsx]

## Sheet: 44h_cuticle genes changes
feature	e2f_44	Bypass_44
FBgn0000042	-2.01396	-2.62889
FBgn0000308	-2.33156	-2.80845
FBgn0000451	-0.318057	-0.84589
FBgn0000527	6.26755	3.57563
FBgn0000551	1.33767	0.114566
FBgn0001311	0.0470219	-0.534139
FBgn0001321	-0.490282	-0.924629
FBgn0002577	0.137416	-0.361107
FBgn0003162	3.52868	1.54338
FBgn0003721	-0.664866	-0.660729
FBgn0003884	-0.168375	0.0631226
FBgn0004511	5.02125	5.10852
FBgn0004554	-0.596516	-4.77626
FBgn0004577	-2.14827	-2.3714
FBgn0004687	-3.07781	-2.9624
FBgn0004780	-2.16185	-1.84077
FBgn0004781	-3.15383	-10.0738
FBgn0004782	-0.102172	0.664852
FBgn0004783	0.858343	1.7922
FBgn0005626	-0.400196	-2.23092
FBgn0010470	-1.12519	-1.82014
FBgn0015766	-2.70882	-4.93377
FBgn0016047	-0.860917	-0.469259
FBgn0016926	-1.94232	-1.48192
FBgn0020521	-0.733706	0.473999
FBgn0022702	0.202728	-0.550373
FBgn0024897	2.00919	1.42456
FBgn0026077	-1.32187	-2.34997
FBgn0026084	0.0259487	-0.183595
FBgn0026404	-1.79862	-1.85923
FBgn0028544	-1.94708	-3.1021
FBgn0028622	-2.62598	-2.50287
FBgn0028938	1.37566	-2.99359
FBgn0029170	-1.85997	-3.62874
FBgn0030001	0.848192	0.222879
FBgn0030158	1.0713	-0.638438
FBgn0030160	0.855958	0.793414
FBgn0031918	0.518973	0.361191
FBgn0031940	0.463511	-2.06896
FBgn0031957	-1.99871	-2.67568
FBgn0032538	0.183238	-1.51322
FBgn0032598	-1.82586	-3.25988
FBgn0032856	0.391976	-0.165987
FBgn0033158	-1.328	-3.61943
FBgn0033307	-0.849948	-4.87464
FBgn0033580	4.03245	4.79714
FBgn0033597	-3.19187	-9.35902
FBgn0033600	-2.40715	-5.09745
FBgn0033635	-0.662874	-2.05915
FBgn0033645	0.0843898	-2.88692
FBgn0033725	1.45115	-0.127676
FBgn0033728	1.43384	0.681795
FBgn0033730	-0.289286	-0.707473
FBgn0033731	-2.16312	-5.19977
FBgn0033736	-4.02531	-6.73642
FBgn0033867	-3.87884	-9.89276
FBgn0033869	-1.31436	-2.94851
FBgn0033942	-4.96353	-7.29272
FBgn0034157	-6.13774	-4.70262
FBgn0034159	-6.27085	-6.5754
FBgn0034499	-4.3911	-4.91008
FBgn0034642	1.93397	0.888221
FBgn0035049	0.354661	-0.101901
FBgn0035234	-4.42304	-5.25418
FBgn0035279	-2.40561	-5.07138
FBgn0035281	-1.17831	-1.27577
FBgn0035398	-0.243733	-0.831235
FBgn0035429	-0.835041	-1.62126
FBgn0035439	-0.879775	-2.41409
FBgn0035490	-5.90996	-12.9095
FBgn0035499	1.77728	0.582329
FBgn0035510	0.378575	-9.1637
FBgn0035512	-2.26748	-3.10295
FBgn0035612	-2.02848	-2.54807
FBgn0035737	-0.610719	-1.33236
FBgn0035792	2.68034	-0.704808
FBgn0035875	-5.45969	-8.90408
FBgn0036590	6.84776	6.0722
FBgn0036591	1.99327	3.05879
FBgn0036597	-1.04286	-1.7979
FBgn0036618	0.253219	-0.443897
FBgn0036680	2.98955	2.74614
FBgn0036878	3.38442	1.94406
FBgn0036880	-1.79993	-3.3978
FBgn0036881	-0.129761	-1.42377
FBgn0036985	-3.5241	-8.91977
FBgn0037069	-0.271853	-1.91351
FBgn0037114	3.4085	2.61711
FBgn0037224	2.21946	1.24205
FBgn0037227	-4.00896	-4.95955
FBgn0037323	0.623042	-0.891114
FBgn0037406	-2.03513	-2.8466
FBgn0037411	-0.403744	-0.912718
FBgn0037412	-3.49433	-5.40905
FBgn0037414	-1.51366	-2.48516
FBgn0037415	-0.356769	-0.743555
FBgn0037416	0.686679	0.339994
FBgn0037419	-1.85705	-3.24265
FBgn0037796	-0.351059	0.261563
FBgn0037972	-2.31817	-0.675224
FBgn0037992	0.182827	-0.321831
FBgn0038105	10.8973	7.0575
FBgn0038133	6.97865	6.669
FBgn0038180	4.14403	2.27493
FBgn0038405	-2.28575	-1.46621
FBgn0038487	0.0173726	-0.994196
FBgn0038714	-11.4142	-5.03028
FBgn0038819	-1.97582	-0.873042
FBgn0038879	2.80677	0.360462
FBgn0039161	-1.49067	-4.17314
FBgn0039469	-2.22994	-7.00822
FBgn0039480	-1.51506	-2.07403
FBgn0039481	3.21391	-1.39289
FBgn0039648	2.75611	1.76042
FBgn0039704	4.24874	4.50535
FBgn0039719	-5.30356	-0.0577342
FBgn0039805	-1.46633	-2.11631
FBgn0039851	4.67935	4.56984
FBgn0039852	1.67779	1.26513
FBgn0039896	-1.74835	-3.15975
FBgn0043792	-4.89512	-4.25302
FBgn0050101	-2.81011	-2.42677
FBgn0051997	-1.022	-2.51017
FBgn0052029	-4.18924	-6.52554
FBgn0052354	0.203625	-0.465012
FBgn0052499	-1.72461	-3.0853
FBgn0053196	-1.5404	-2.18652
FBgn0066365	0.383876	-0.232121
FBgn0085234	-1.7594	-1.95246
FBgn0085250	-2.60515	-4.17307
FBgn0085446	-0.809204	-2.09123
FBgn0250833	-1.4293	-2.92874
FBgn0250871	-2.56044	-3.06359
FBgn0259223	-3.14287	-3.98569
FBgn0259233	-1.40875	-3.24376
FBgn0260653	-3.90882	-6.42418
FBgn0261260	0.119516	-0.255434
FBgn0261341	-3.49561	-5.92588
FBgn0261799	1.94868	1.39486
FBgn0263132	-1.82527	-3.57405
FBgn0266599	-0.877344	-0.777238
